# Supplementary material for: Coatings of hydroxyapatite–bioactive glass microparticles for adhesion to biological tissues
Source: Royal Society of Chemistry journal article supplement (doi:10.1039/d2ra02781j), 2022-01-01
Supplement: d2ra02781j1.pdf [file d2ra02781j1.pdf]

## Supplementary Information

### COATINGS OF HYDROXYAPATITE-BIOACTIVE GLASS MICROPARTICLES FOR ADHESION TO BIOLOGICAL TISSUES

Estelle Palierse, Maïlie Roquart, Sophie Norvez, Laurent Corté

Dr. E. Palierse  
Molecular, Macromolecular Chemistry, and Materials  
ESPCI Paris, CNRS, PSL University  
75005 Paris, France  
E-mail: [estelle.palierse@espci.psl.eu](mailto:estelle.palierse@espci.psl.eu)

M. Roquart  
Centre des Matériaux  
MINES Paris, CNRS, PSL University  
91003 Evry, France  
Molecular, Macromolecular Chemistry, and Materials  
ESPCI Paris, CNRS, PSL University  
75005 Paris, France  
E-mail: [mailie.roquart@minesparis.psl.eu](mailto:mailie.roquart@minesparis.psl.eu)

Dr S. Norvez  
Molecular, Macromolecular Chemistry, and Materials  
ESPCI Paris, CNRS, PSL University  
75005 Paris, France  
E-mail: [sophie.norvez@espci.psl.eu](mailto:sophie.norvez@espci.psl.eu)

Prof. L. Corté  
Centre des Matériaux  
MINES Paris, CNRS, PSL University  
91003 Evry, France  
Molecular, Macromolecular Chemistry, and Materials  
ESPCI Paris, CNRS, PSL University  
75005 Paris, France  
E-mail: [laurent.corte@minesparis.psl.eu](mailto:laurent.corte@minesparis.psl.eu)

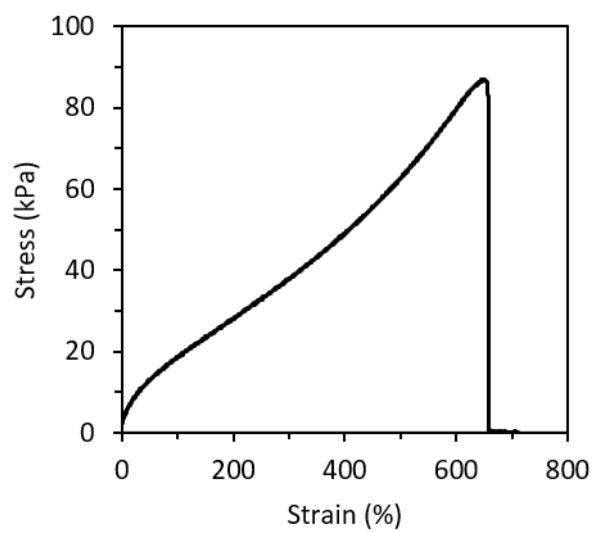

**Fig. S1** Stress-strain curve during tensile test at break of PBT film at  $1 \text{ mm.s}^{-1}$

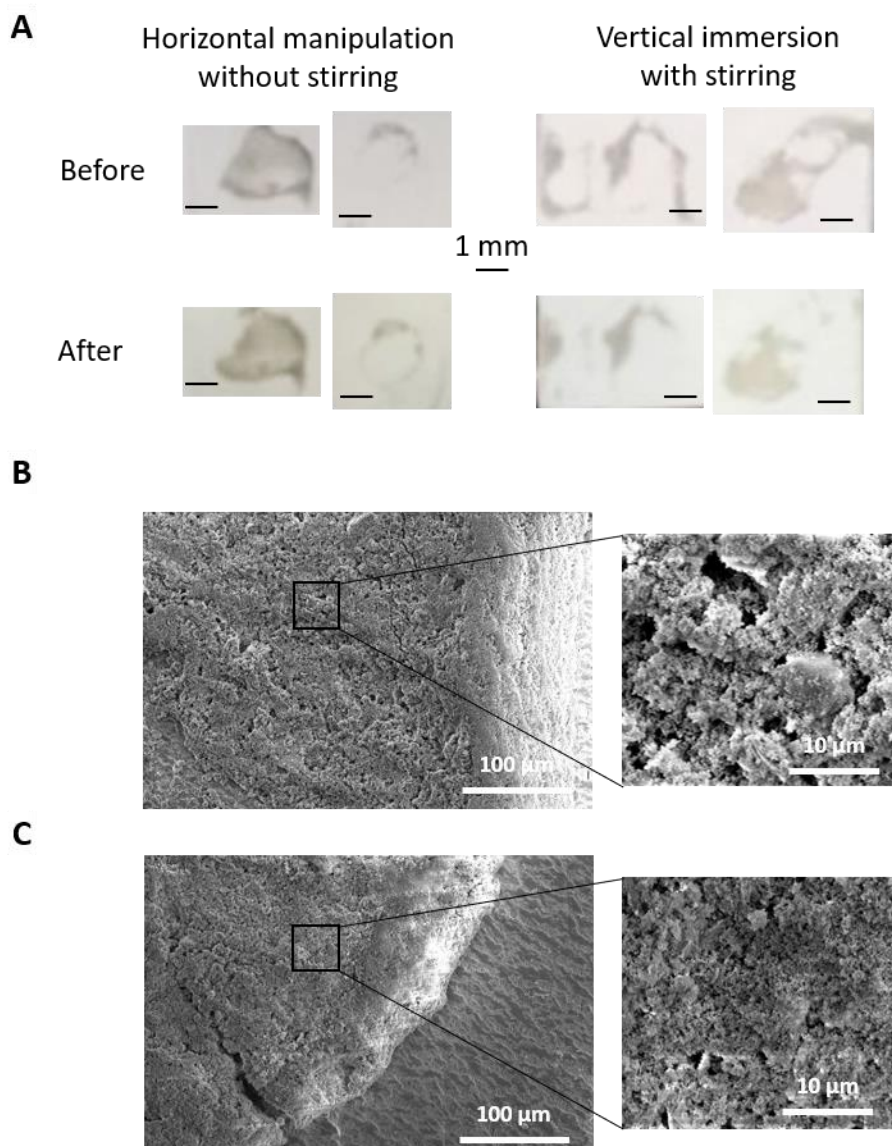

**Fig. S2.** Control experiment to demonstrate the stability of particles during manipulation in degradation experiments. **A.** Macrographs of HA-BG coatings on PTFE surfaces (coating density  $0.2 \text{ mg.cm}^{-2}$ ) before (top) and after (bottom) immersion with the proposed protocol (left) and with severe manipulation vertical immersion with stirring (right). **B,C.** SEM observations of HA-BG coatings on PTFE before immersion (**B**) and after immersion with the proposed protocol (**C**).

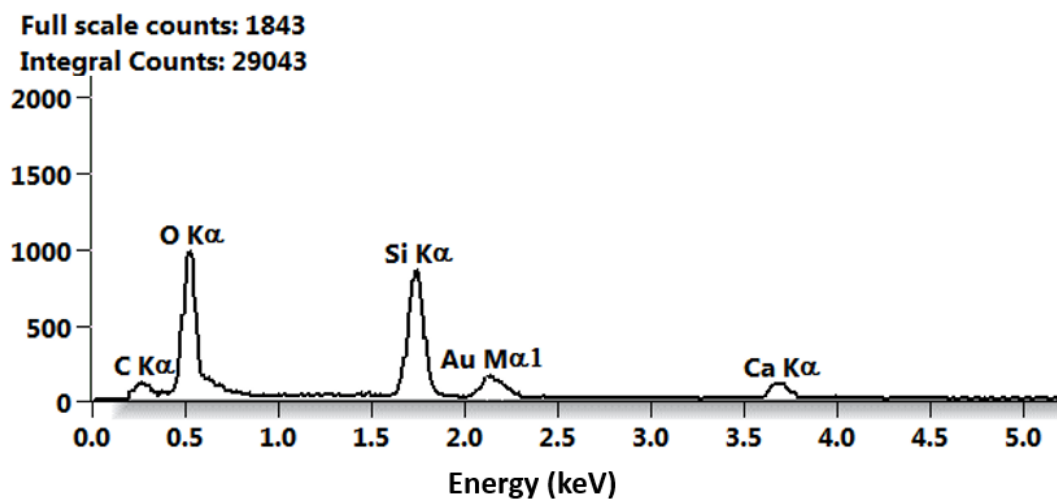

**Fig. S3** EDS spectrum of bioactive glass precursor particles during the synthesis of HA-BG particles. Particles were coated with a 5 nm Au layer and experiments were performed at a voltage of 15 kV.

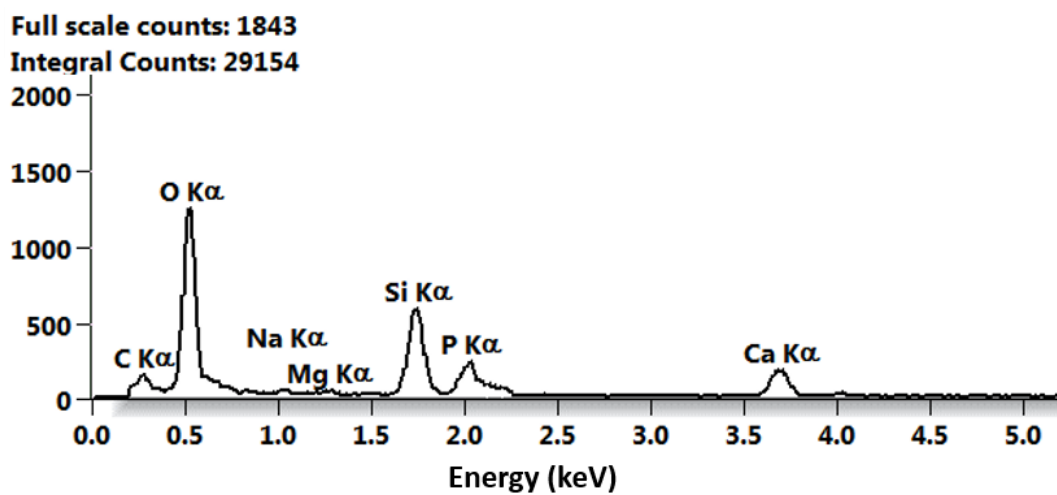

**Fig. S4** EDS spectrum of HA-BG particles. Particles were coated with a 5 nm Au layer and experiments were performed at a voltage of 15 kV.

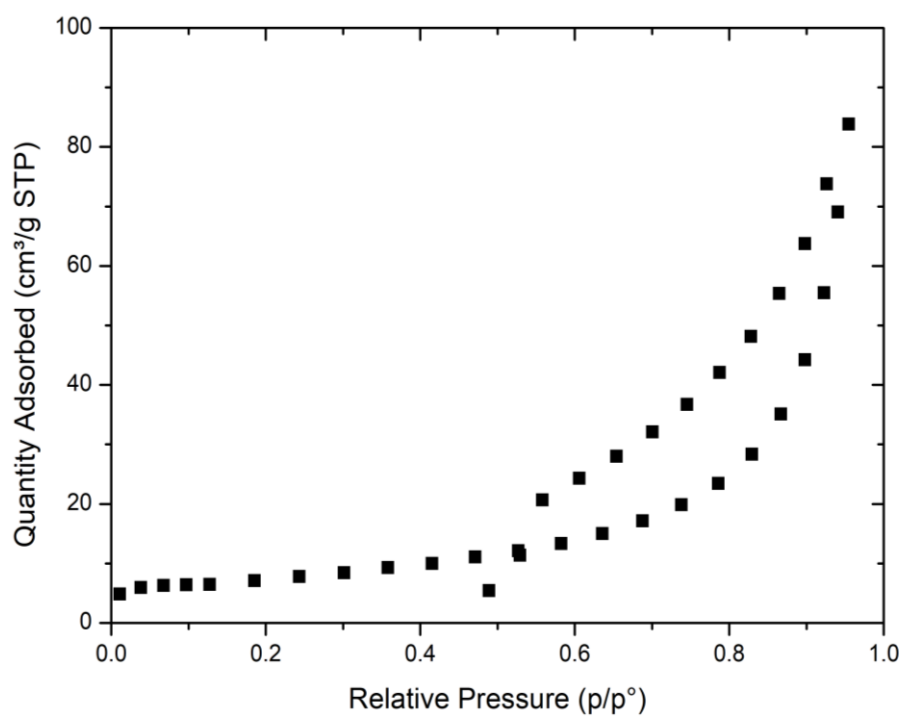

**Fig. S5** *N<sub>2</sub>* sorption isotherm of HA-BG performed at 77 K after activating the samples at 150 °C for 15 h.

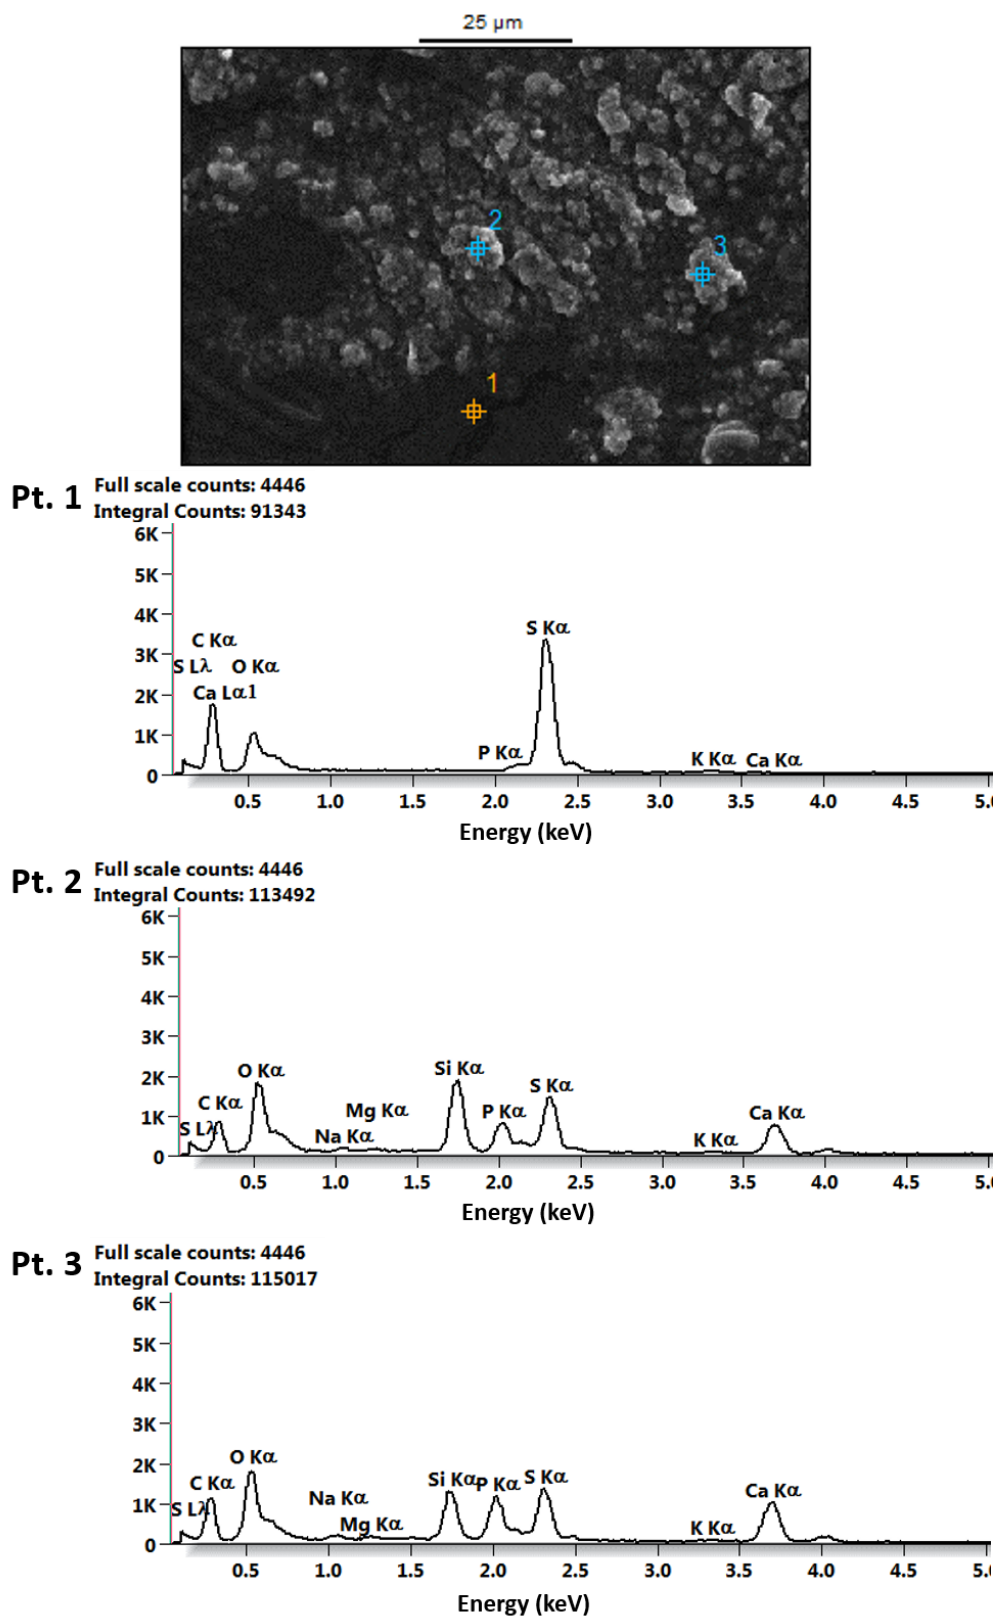

**Fig. S6** EDS spectrum of HA-BG coating on cross-linked PBT film. Pt1 corresponds to a gel area not coated, as illustrated by the absence of peak corresponding to Ca, P or Si but a peak of S which is present in the gel structure. Pt2 corresponds to a coated area illustrated by the presence of Ca, P and Si peaks, and the diminution of the S peak. Films were coated with a 5 nm Au layer and experiments were performed at a voltage of 15 kV.

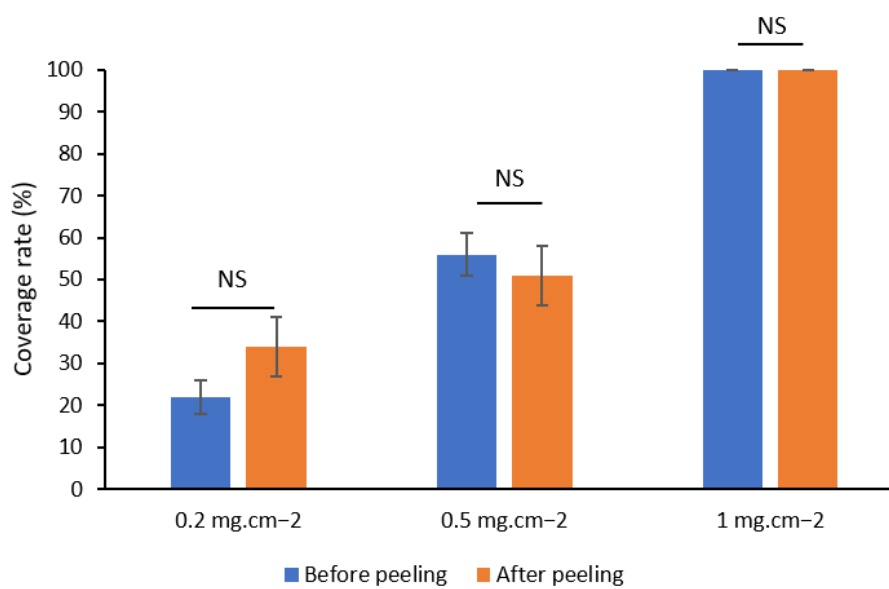

**Fig. S7** Coverage rate measured by analysis of SEM images before and after peeling for HA-BG coated films with coating densities:  $0.2 \text{ mg}\cdot\text{cm}^{-2}$  (V20\_C10),  $0.5 \text{ mg}\cdot\text{cm}^{-2}$  (V20\_C25),  $1.0 \text{ mg}\cdot\text{cm}^{-2}$  (V20\_C50).
